# Supplementary material for: Identification of the Eutrema salsugineum EsMYB90 gene important for anthocyanin biosynthesis
Source: BMC Plant Biol. 2020 Apr 28;20:186. doi: 10.1186/s12870-020-02391-7 (PMC7189703; doi:10.1186/s12870-020-02391-7)
Supplement: Supplementary file 7 — Additional file 7. Detailed data for validation of RNA-Seq results using quantitative real-time PCR. [file 12870_2020_2391_MOESM7_ESM.xlsx]

## Sheet: Additional file 7
		Gene ID (Accession Number)	Transcript ID	Name Abbreviation	Name in NCBI	Transcriptome			qRT-PCR
						log2FoldChange(T/WT)	Pvalue	padj	(-ΔΔCT）	STDEV
		Anthocyanin biosynthesis genes
		107803097	XM_016626713.1	DFR	dihydroflavonol-4-reductase-like	10.5065	4.79975e-102	2.73063e-98	14.515	0.0650641
		107778118	XM_016598316.1	LDOX54	leucoanthocyanidin dioxygenase-like	10.8399	4.99006e-236	2.55501e-231	12.2217	0.0173205
		107781346	XM_016602356.1	3GT12	anthocyanidin 3-O-glucosyltransferase-like precursor	7.17508	1.22507e-142	1.56815e-138	6.61667	0.06245
		107781522	XM_016602236.1	3GT36	anthocyanidin 3-O-glucosyltransferase-like	5.48386	9.84557e-81	3.36075e-77	5.31833	0.0057735
		107831042	XM_016658753.1	3GT53	anthocyanidin 3-O-glucosyltransferase	5.17713	1.84727e-90	6.75598e-87	5.18333	0.01
		Antioxidant related genes
		107806960	XM_016631233.1	Cu-Zn SOD	superoxide dismutase [Cu-Zn], chloroplastic	2.34754	0.000215053	0.00623154	2.79333	0.0057735
		107772738	XM_016592217.1	P450	cytochrome P450 71A4-like	-2.14578	0.000133764	0.00419154	-2.59667	0.0404145
		107827231	XM_016654329.1	POD44-1	peroxidase 44-like	2.15402	1.02552e-06	6.24357e-05	1.88	0.0737111
		107797651	XM_016620554.1	POD44-2	peroxidase 44-like	3.70999	1.94529e-09	2.2776e-07	1.43	0.0264575
		Genes of transcription factor
		107795590	XM_016618260.1	bZIP	zinc finger protein CONSTANS-like	-2.1345	0.0019575	0.0379931	-2.69667	0.178979
		107795213	XM_016617807.1,XM_016617808.1,XM_016617809.1	Myb3R-1	myb-related protein 3R-1-like	2.07797	1.601e-08	1.50942e-06	2.19333	0.0665833
		107802984	XM_016626570.1	Myb4	myb-related protein Myb4-like	5.24437	5.072e-23	3.05521e-20	4.59167	0.08544
		107825953	XM_016652887.1	WRKY53	probable WRKY transcription factor 53	2.35571	3.911e-05	0.00146373	2.40667	0.0288675
		Genes of ion channel
		107761230	XM_016579425.1	AKT2/3	potassium channel AKT2/3-like	-4.27858	9.47026e-19	4.14441e-16	-1.76333	0.0208167
		Signal pathway related genes
		107805986	XM_016630104.1	AX15A	auxin-induced protein 15A-like	-2.39357	0.000164874	0.00502494	-1.62667	0.0832666
		107803626	XM_016627389.1	CaM1	calmodulin-like protein 1	-2.78001	2.70701e-13	6.05258e-11	-3.28333	0.110151
		107782983	XM_016603941.1	MAPK3	mitogen-activated protein kinase kinase kinase NPK1-like	4.90531	4.5775e-19	2.07414e-16	4.37167	0.02
		107806359	XM_016630502.1	MAPK6	mitogen-activated protein kinase kinase 6-like	2.45304	4.90496e-07	3.2701e-05	2.10333	0.110151
